# Supplementary material
Source: publisher site journal article supplement (https://www.dovepress.com/article/406082)
Supplement: Supplementary file 1 [file get_supplementary_file.php]

**Supplementary Table 1.** Markers associated with recurrence/residual disease analysed by ROC curve

| **Items** | **Area under curve** | ***P* value** | **95% CI of *P* value** |
| --- | --- | --- | --- |
| White blood cell count | 0.471 | 0.508 | 0.383-0.558 |
| Red blood cell count | 0.578 | 0.080 | 0.484-0.672 |
| Neutrophil count | 0.506 | 0.894 | 0.414-0.598 |
| Lymphocyte count | 0.399 | 0.022 | 0.317-0.480 |
| Haemoglobin count | 0.546 | 0.296 | 0.446-0.647 |
| [Platelet count](http://www.baidu.com/link?url=_7ATIvrhbE4kzlME3SojWFYQb9Cm-cW7lS9fhvETUAxmdff-M1pq9zR32fJ1yumfJPgF2Jai3LbHOChfJdLdoDcSsdbDpSoSc-3g-Ft3M5LTZ2EPQDIfBM6v26fziiqQ) | 0.532 | 0.471 | 0.436-0.628 |
| NLR | 0.567 | 0.128 | 0.478-0.656 |
| LMR | 0.445 | 0.214 | 0.355-0.534 |
| PLR | 0.624 | 0.005 | 0.540-0.707 |

**Abbreviations:** NLR, neutrophil-to-lymphocyte ratio; LMR, lymphocyte-to-monocyte ratio; PLR, platelet-to-lymphocyte ratio; 95% CI, 95% confidence interval.

**Supplementary Table 2.** Clinicopathologic characteristics associated with recurrence/residual HSIL/LSIL

| **Items** | **Recurrence/residual HSILa** | **Recurrence/residual LSILb** | ***P* valuec** |
| --- | --- | --- | --- |
| Age (years)  < 40  ≥ 40  Gland invasive  No invasion  Invasion  Margin status  Negative  Positive  Preoperative cytology  NILM  ASC-US or worse  Preoperative pathology  CIN Ⅱ  CIN Ⅲ  HR-HPV infection  Negative  Positive  HPV genotype  None or single  Double or multiple  Preoperative serum markers  White blood cell count  Neutrophil count  Lymphocyte count  Monocyte count  Systemic inflammation index  NLR  LMR  PLR | 17 (70.8%)  7 (29.2%)  8 (33.3%)  16 (66.7%)  24 (100.0%)  0 (0.0%)  8 (33.3%)  16 (66.7%)  16 (66.7%)  8 (33.3%)  3 (12.5%)  21 (87.5%)  17 (29.2%)  7 (70.8%)  6.36 (×109/L)  4.14 (×109/L)  1.73 (×109/L)  0.38 (×109/L)  2.63  146.30  5.08 | 26 (100.0%)  0 (0.0%)  7 (36.8%)  19 (63.2%)  26 (100.0%)  0 (0.0%)  7 (26.9%)  19 (73.1%)  23 (88.5%)  3 (11.5%)  0 (0.0%)  26 (100.0%)  15 (57.7%)  11 (42.3%)  5.96 (×109/L)  3.60 (×109/L)  1.86 (×109/L)  0.42 (×109/L)  2.09  142.45  4.66 | 0.010  0.621  -  0.621  0.063  0.063  0.333  0.607  0.327  0.272  0.536  0.954  0.831  0.341 |

**Notes:** a Recurrence/residual HSIL was defined as HSIL confirmed after operation; b recurrence/residual LSIL was defined as LSIL confirmed after operation; c a *p* value<0.05 indicates a statistically significance.

**Abbreviations:** HSIL, high-grade squamous intraepithelial lesion; LSIL, low-grade squamous intraepithelial lesion; NILM, no intraepithelial lesions or malignant cells; ASC-US, atypical squamous cells of undetermined significance; CIN, cervical intraepithelial neoplasia; HR-HPV, high-risk human papillomavirus; NLR, neutrophil-to-lymphocyte ratio; LMR, lymphocyte-monocyte ratio; PLR, platelet-to-lymphocyte ratio.
